# Supplementary material for: Mechanism of microtubule stabilization by taccalonolide AJ
Source: PubMed Central journal article supplement (PMC5467209; doi:10.1038/ncomms15787), 2017-06-06
Supplement: ncomms15787-s1.pdf [file ncomms15787-s1.pdf]

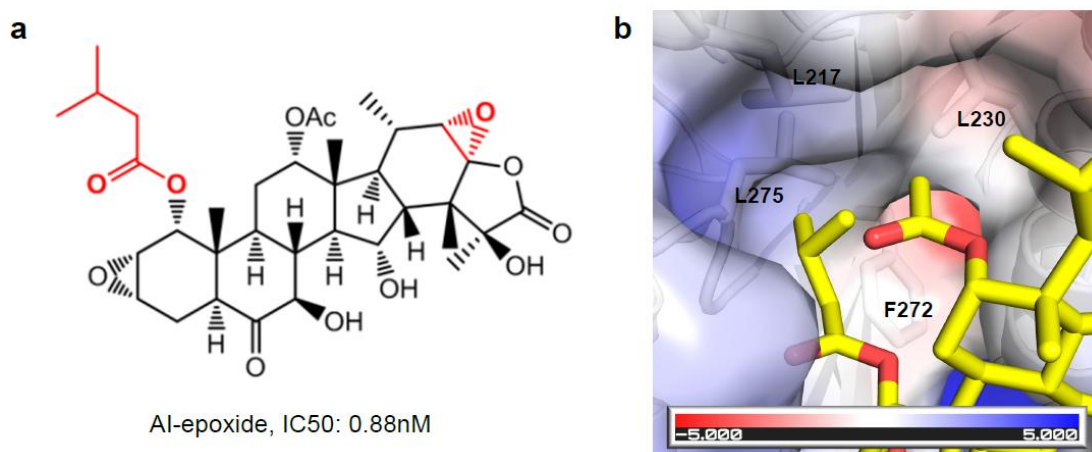

**Supplementary Figure 1. Docking model of tubulin-AI-epoxide.** (a) Chemical formula of AI-epoxide. Its epoxide and isovaleryloxy group are colored red. (b) The isovaleryloxy group of AI-epoxide sticks to a hydrophobic pocket. Electrostatic surface potential of the  $\beta$ -tubulin is shown. Blue and red (+/-5 kT/e) indicate the positively and negatively charged areas, respectively, of the protein. AI-epoxide (yellow) and the hydrophobic residues (grey) forming the pocket are shown in sticks.

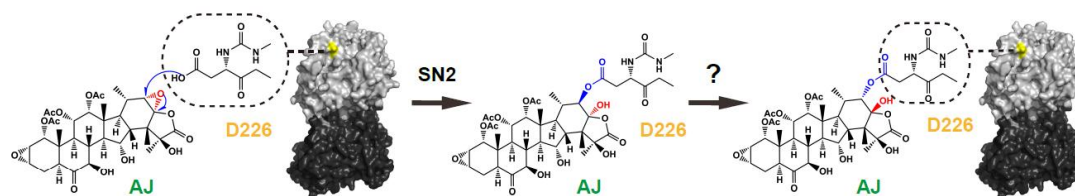

**Supplementary Figure 2. The covalent bond between AJ and  $\beta$ D226 raises a question of chirality of the epoxide group.** SN2 reaction: the carboxyl group of  $\beta$ D226 attacks the C22 as a nucleophile, resulting in the epoxide ring opening and an ester bond between  $\beta$ D226 and AJ. However, the chiralities of the resulting ester bond (blue) and the hydroxyl group (red) by a SN2 reaction are not consistent with what we observed in the crystal structure.

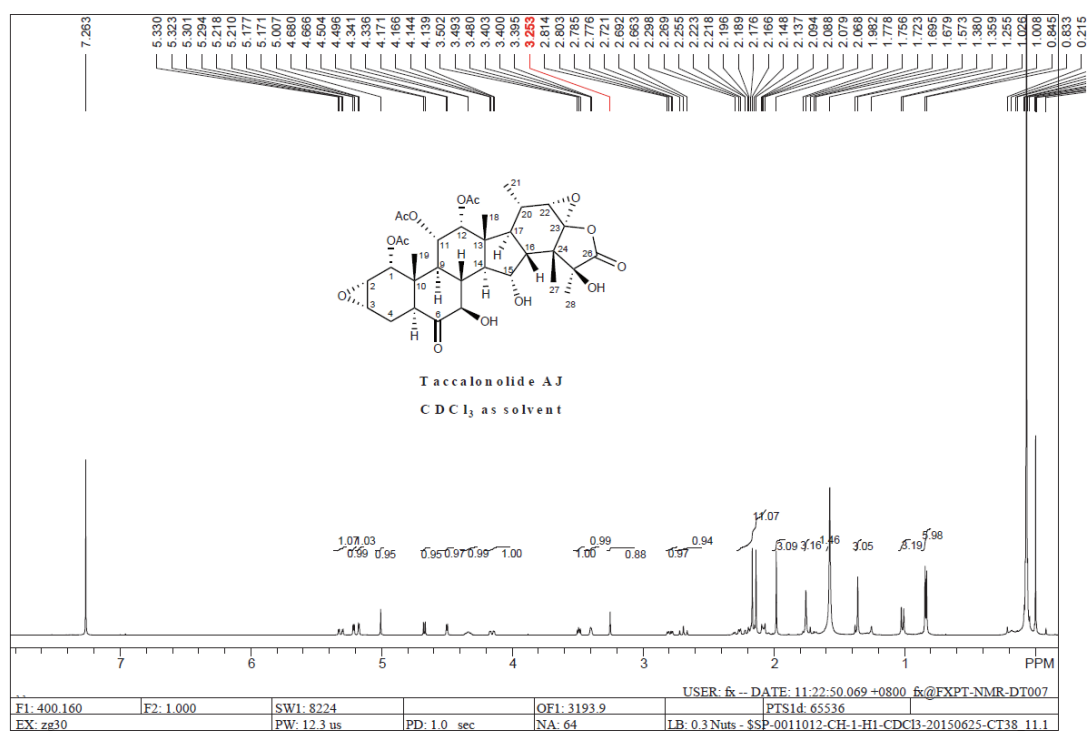

**Supplementary Figure 3.**  $^1\text{H}$  NMR for taccalonolide AJ. Components in  $\text{CDCl}_3$ , at room temperature (ppm Downfield from TMS). The chemical shift of H22 is colored red.

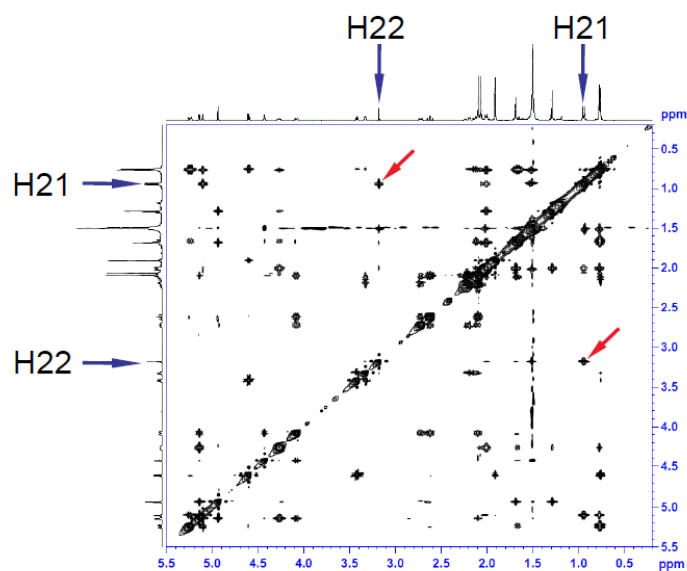

**Supplementary Figure 4.** NOESY contour plot of taccalonolide AJ. The NOE correlations between H21 and H22 are indicated by red arrows.

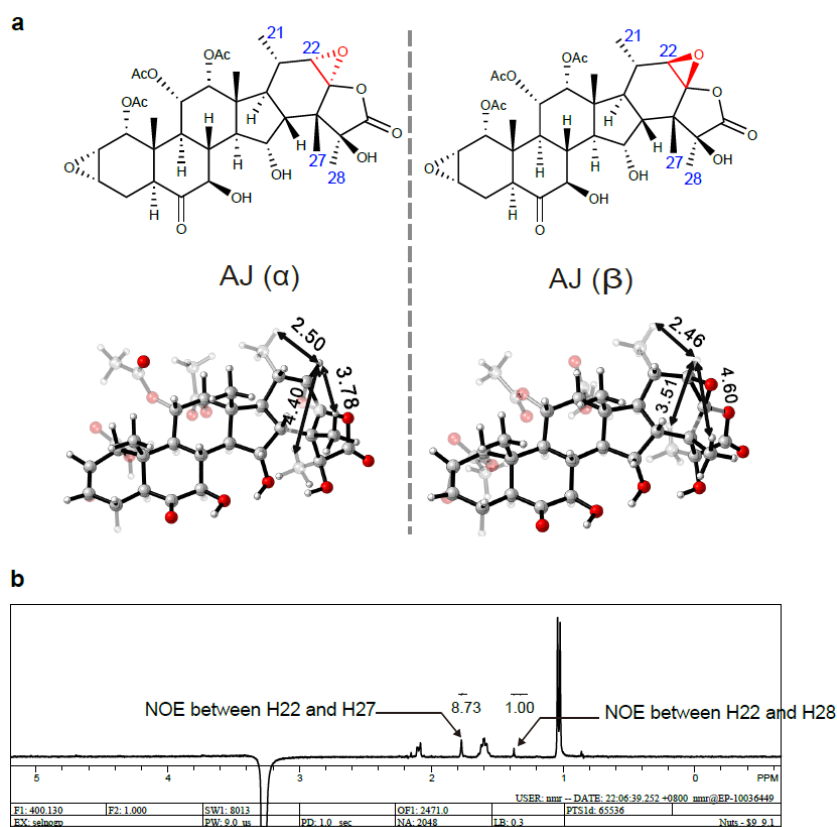

**Supplementary Figure 5. The epoxide of taccalonolide AJ is in  $\alpha$  configuration.** (a) Gaussian calculations for taccalonolide AJ( $\alpha$ ) and AJ( $\beta$ ). (b) Nuclear Overhauser Effect (NOE) of taccalonolide AJ, selectively labeled NOE correlations between H22 and H27 or H28.
